# Supplementary material for: What empirical research has been undertaken on the ethics of clinical research in India? A systematic scoping review and narrative synthesis
Source: HighWire-hosted journal article supplement (doi:10.1136/bmjgh-2020-004729), 2021-05-01
Supplement: bmjgh-2020-004729supp001_data_supplement.pdf [file bmjgh-2020-004729supp001_data_supplement.pdf]

**Supplementary file 1: Figure - Clinical trials approved in India by year and the evolution of research on the ethics of clinical trials in India mapped against key regulatory developments**

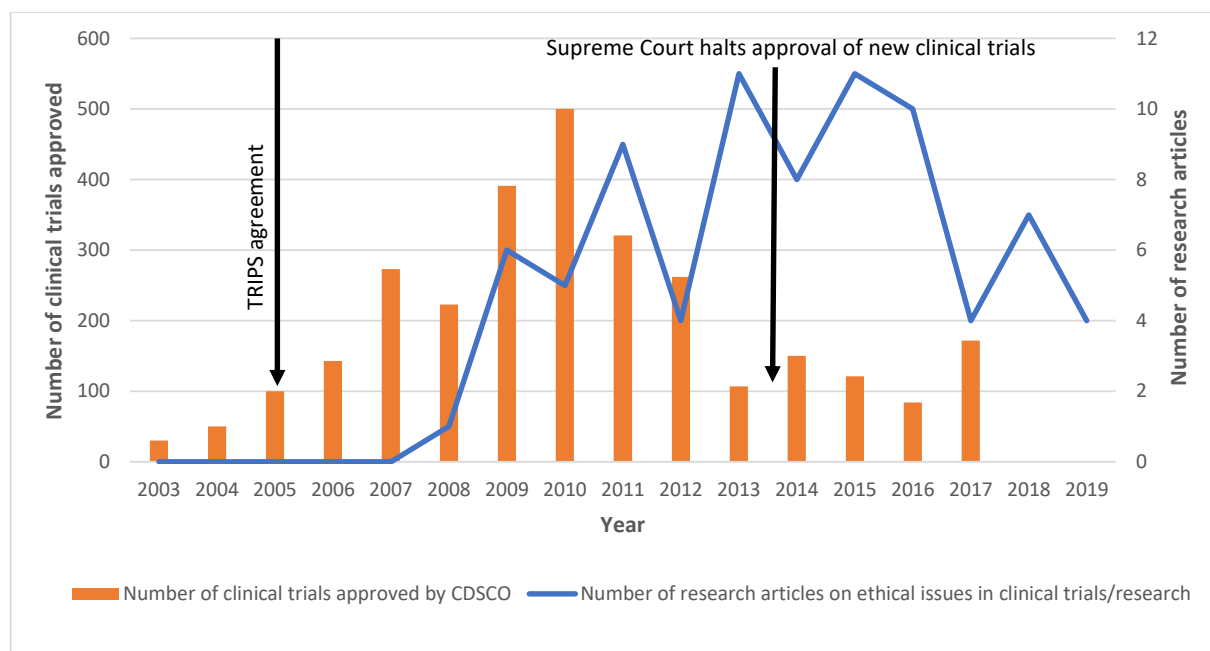

Source: Data on number of trials approved by CDSCO (Central Drugs Standard Control Organisation) is taken from multiple articles; 2003-2008;<sup>2</sup> 2009-2014;<sup>3</sup> 2015-2017<sup>31</sup>
