# Supplementary material for: What empirical research has been undertaken on the ethics of clinical research in India? A systematic scoping review and narrative synthesis
Source: HighWire-hosted journal article supplement (doi:10.1136/bmjgh-2020-004729), 2021-05-01
Supplement: bmjgh-2020-004729supp003_data_supplement.pdf [file bmjgh-2020-004729supp003_data_supplement.pdf]

**Supplementary file 3: Inclusion criteria for identification of eligible studies**

|                               |                                                                                                                                                                                                                                                                                                                                                 |
|-------------------------------|-------------------------------------------------------------------------------------------------------------------------------------------------------------------------------------------------------------------------------------------------------------------------------------------------------------------------------------------------|
| <b>Setting</b>                | India (other South Asian countries included in search, but not in any further steps reported)                                                                                                                                                                                                                                                   |
| <b>Population</b>             | Any stakeholder groups <ul style="list-style-type: none"><li>• Lay – patients/patients' guardians, public, CT/cohort study participants;</li><li>• Professional – healthcare/research faculty, students or practitioners, members/staff of ethics committees or regulatory/governmental agencies</li><li>• Other – relevant documents</li></ul> |
| <b>Phenomenon of interest</b> | Any ethical aspects of conducting clinical trials/research in India (e.g. informed consent, scientific misconduct, research governance, ethics committees and approvals, good clinical practice)                                                                                                                                                |
| <b>Study design</b>           | Primary/secondary research of any design conducted on human participants (including observational, experimental, quasi-experimental, randomised controlled trials, qualitative, mixed methods)                                                                                                                                                  |
