# Supplementary material for: What empirical research has been undertaken on the ethics of clinical research in India? A systematic scoping review and narrative synthesis
Source: HighWire-hosted journal article supplement (doi:10.1136/bmjgh-2020-004729), 2021-05-01
Supplement: bmjgh-2020-004729supp006_data_supplement.pdf [file bmjgh-2020-004729supp006_data_supplement.pdf]

## Supplementary file 6: Research aims, settings and methods of individual studies

| Study                                                                                                                           | Research aims and setting                                                                                                                                                                                                                        | Research methods                                                      |
|---------------------------------------------------------------------------------------------------------------------------------|--------------------------------------------------------------------------------------------------------------------------------------------------------------------------------------------------------------------------------------------------|-----------------------------------------------------------------------|
| <b>A. Primary research: Knowledge (or awareness/comprehension), attitudes (or perceptions), practice (or behaviour)</b>         |                                                                                                                                                                                                                                                  |                                                                       |
| <b>• Studies on the comprehension of the informed consent form and/or verbal information provision</b>                          |                                                                                                                                                                                                                                                  |                                                                       |
| Arora et al, 2011 <sup>62</sup>                                                                                                 | To assess comprehension of ICF/IC among participants in a first-in-human study of a novel drug in healthy male volunteers; Chandigarh, India                                                                                                     | Questionnaire survey; n=50                                            |
| Bhansali et al, 2009 <sup>65</sup>                                                                                              | To assess comprehension of ICF/IC among patients invited to participate in a phase 3 multi-centric trial of a novel lipid lowering agent; Chandigarh, India                                                                                      | Questionnaire survey; n=42                                            |
| Figer et al, 2017 <sup>78</sup>                                                                                                 | To assess comprehension of ICF/IC among participants in a Phase 2/3 rabies monoclonal antibody trial, before and after introduction of mandatory audio-visual recording of IC process in 2013; Mumbai, Maharashtra, India                        | Questionnaire survey; n=38                                            |
| George et al, 2018 <sup>80</sup>                                                                                                | To assess comprehension of ICF/IC in hypothetical RCTs among adult in-patients with non-organic psychiatric disorders and among their key relatives; Vellore, Tamil Nadu, India                                                                  | Questionnaire survey; n=32 (14 patients; 18 relatives)                |
| Gota et al, 2018 <sup>82</sup>                                                                                                  | To assess comprehension of ICF/IC among patients enrolled in Phase 1, 2 or 3 interventional studies; Mumbai, Maharashtra, India                                                                                                                  | Questionnaire survey; n=200                                           |
| Joglekar et al, 2013 <sup>87</sup>                                                                                              | To assess comprehension of ICF/IC among participants in a cohort study aimed at estimating HIV incidence in a high-risk population; Pune, Maharashtra, India                                                                                     | Questionnaire survey; n=1334                                          |
| Kamath et al, 2014 <sup>91</sup>                                                                                                | To assess comprehension of ICF/IC among medical students invited to participate in a hypothetical anti-malarial drug; South India                                                                                                                | Questionnaire survey; n=155                                           |
| Nambiar et al, 2012 <sup>104</sup>                                                                                              | To assess comprehension of ICF/IC among nursing trainees participating in a tuberculosis exposure and latency cohort study; Vellore, Tamil Nadu, India                                                                                           | Questionnaire survey; n=138                                           |
| Sarkar et al, 2009 <sup>117</sup>                                                                                               | To assess comprehension and recall of ICF/IC among parents/guardians of a birth cohort of children from urban slums participating in a diarrhoeal surveillance study; Vellore, Tamil Nadu, India                                                 | Questionnaire survey; n=368                                           |
| Sarkar et al, 2010 <sup>116</sup>                                                                                               | To assess comprehension of ICF/IC among parents of children from rural pre-schools participating in an RCT of nutritional supplementation, randomised to receive group or individual counselling for IC; Kaniyambadi, Vellore, Tamil Nadu, India | RCT employing questionnaire survey; n=118 (from 16 rural pre-schools) |
| <b>• Studies on Knowledge, Attitudes, Practices in relation to clinical trials/research, research ethics, ethics committees</b> |                                                                                                                                                                                                                                                  |                                                                       |
| Bhowmick et al, 2014 <sup>130</sup>                                                                                             | To assess knowledge, attitudes and practice of ethics committee functioning among ethics committee members; Kolkatta, West Bengal, India                                                                                                         | Questionnaire survey; n=30 (from 10 ethics committees)                |
| Burt et al, 2013 <sup>69</sup>                                                                                                  | To study knowledge and perceptions of clinical research among general public; New Delhi, India                                                                                                                                                   | Questionnaire survey; n=175 (from eight public locations)             |
| Choudhury et al, 2016 <sup>75</sup>                                                                                             | To assess knowledge and perceptions of clinical trials among doctors from government medical colleges; West Bengal, India                                                                                                                        | Questionnaire survey; n=133 (from three medical colleges)             |
| Deolia et al, 2014 <sup>77</sup>                                                                                                | To assess knowledge, attitudes and behaviour pertaining to research ethics among dental professionals in a private dental institute; South India                                                                                                 | Questionnaire survey; n=213                                           |
| Dhodi et al, 2013 <sup>131</sup>                                                                                                | To assess knowledge, attitudes and practices towards clinical research among medical students and teachers; Mumbai, Maharashtra, India                                                                                                           | Questionnaire survey; n=395                                           |
| Gopinath et al, 2014 <sup>81</sup>                                                                                              | To assess knowledge and attitudes about research ethics and ethics committees among dental faculty; Chennai, Tamil Nadu, India                                                                                                                   | Questionnaire survey; n=81                                            |

|                                        |                                                                                                                                                                                                                                                      |                                                                                                                                                                                                                    |
|----------------------------------------|------------------------------------------------------------------------------------------------------------------------------------------------------------------------------------------------------------------------------------------------------|--------------------------------------------------------------------------------------------------------------------------------------------------------------------------------------------------------------------|
| Hussain et al, 2019 <sup>132</sup>     | To assess knowledge, attitudes and practice regarding informed consent process in biomedical research in postgraduate medical students in a private medical college; Karnataka, India                                                                | Questionnaire survey, n=114; Group discussions, n=2 (with 10-12 participants each)                                                                                                                                 |
| Londhey et al, 2015 <sup>97</sup>      | To assess awareness of ethics committee composition and functioning among medical teachers; Mumbai, Maharashtra, India                                                                                                                               | Questionnaire survey; n=180                                                                                                                                                                                        |
| Joshi et al, 2012 <sup>88</sup>        | To explore awareness, perceptions of and attitudes towards participating in clinical trials among general public; Pune, Maharashtra, India                                                                                                           | Focus group discussions and interviews; n=24 (7 trial participants; 17 non-trial participants)                                                                                                                     |
| Joshi et al, 2013 <sup>134</sup>       | To assess awareness, perceptions and attitudes toward clinical trials and their views on methods to create awareness among general public; Pune, Maharashtra, India                                                                                  | Questionnaire survey; n=240 (40 trial participants; 200 non-trial participants)                                                                                                                                    |
| Krishna et al, 2014 <sup>140</sup>     | To examine the relationship between contract research organisations (CRO) and healthy volunteers and the recruitment process in relation to bioavailability and bioequivalent studies; Hyderabad, Telangana, India                                   | Case study of one contract research organisation comprising: Interviews (8 CRO staff); group discussions (n=50 healthy volunteers); observations of informed consent discussions (n=40)                            |
| Mallela et al, 2015 <sup>98</sup>      | To assess knowledge and attitudes about research ethics and ethics committees among dental faculty; North India                                                                                                                                      | Questionnaire survey; n=942                                                                                                                                                                                        |
| Meenakumari et al, 2010 <sup>100</sup> | To evaluate awareness of clinical trials among pharmacy undergraduate and postgraduate students; Manipal, Karnataka, India                                                                                                                           | Questionnaire survey; n=102                                                                                                                                                                                        |
| Mishra et al, 2018 <sup>101</sup>      | To examine awareness of ICMR's ethical guidelines, privacy-relation obligations and experiences in implementing ethics guidelines among ethics committee members; New Delhi, India                                                                   | Interviews; n=19                                                                                                                                                                                                   |
| Mohammad et al, 2011 <sup>135</sup>    | To assess knowledge, attitudes and practices of healthcare ethics among medical professionals in a government teaching hospital; Aligarh, Uttar Pradesh, India                                                                                       | Questionnaire survey; n=172                                                                                                                                                                                        |
| Nadig et al, 2011 <sup>102</sup>       | To assess knowledge, attitudes and practices pertaining to ethics review and ethical guidelines among ethics committee members; South India                                                                                                          | Questionnaire survey; n=29 (from 11 ethics committee)                                                                                                                                                              |
| Ramanaik et al, 2015 <sup>112</sup>    | To explore knowledge and perceptions of clinical trials (with a focus on HIV vaccine trials) among frontline health service providers working with female sex workers and men who have sex with men; Bellary, Belgaum, Bangalore in Karnataka, India | Interviews; n=50                                                                                                                                                                                                   |
| Reddy et al, 2013 <sup>137</sup>       | To assess knowledge and attitudes about research ethics and ethics committees among dental faculty; Bhimavaram, Andhra Pradesh, India                                                                                                                | Questionnaire survey; n=100                                                                                                                                                                                        |
| Rodrigues et al, 2013 <sup>113</sup>   | To assess knowledge regarding knowledge regarding research among HIV-infected individuals; Bangalore, Karnataka, India                                                                                                                               | Questionnaire survey; n=173                                                                                                                                                                                        |
| Sridharan et al, 2016 <sup>122</sup>   | To assess knowledge of clinical trials from semi-urban and rural populations in India; India                                                                                                                                                         | Questionnaire survey; n=400                                                                                                                                                                                        |
| Vittalrao et al, 2018 <sup>129</sup>   | To assess awareness of clinical trials among medical undergraduate students; Manipal, Karnataka, India                                                                                                                                               | Questionnaire survey; n=257                                                                                                                                                                                        |
| Vyas et al, 2019 <sup>138</sup>        | To assess knowledge, attitudes and practices regarding informed consent for research purposes among postgraduate resident doctors; Mumbai, Maharashtra, India                                                                                        | Questionnaire survey; n=100                                                                                                                                                                                        |
| Thatte et al, 2009 <sup>125</sup>      | To assess knowledge of compensation clinical trial related injury and among various stakeholders and to review policies on the same; India                                                                                                           | Questionnaire survey, n=80 (30 investigators, 23 ethics committee members, 27 sponsors); Interviews, n=14 (3 investigators, 6 ethics committee members, 5 sponsors); Documents, n=119 (informed consent documents) |

#### A. Primary research: Perceptions, experiences, practices/processes in relation to clinical trials/research, research ethics, ethics committees

|                                       |                                                                                                                                                                                                                                |                                                                                                                                                                     |
|---------------------------------------|--------------------------------------------------------------------------------------------------------------------------------------------------------------------------------------------------------------------------------|---------------------------------------------------------------------------------------------------------------------------------------------------------------------|
| Bindra et al, 2010 <sup>67</sup>      | To explore perceptions on research ethics among investigators; India                                                                                                                                                           | Questionnaire survey; n=29                                                                                                                                          |
| Brahme et al, 2009 <sup>68</sup>      | To study the profile and role of ethics committee members in health and research organisations; Pune, Maharashtra, India                                                                                                       | Questionnaire survey; n=52 ethics committee members from 12 committees                                                                                              |
| Chatterjee et al, 2015 <sup>70</sup>  | To assess feasibility of informed consent procedure in an RCT for people with schizophrenia, from the trial, research and participant perspectives; Tamil Nadu, Maharashtra and Goa, India                                     | Focus group discussions, n=6; consent interviews and participant feedback on IC process, n=332                                                                      |
| Chauhan et al, 2015 <sup>72</sup>     | To explore acceptability of audio-visual recording of the IC process in a hypothetical study and reasons for refusal; Keezhpathupattu, Tamil Nadu, India                                                                       | Structured interviews; n=150                                                                                                                                        |
| Chenneville et al, 2016 <sup>73</sup> | To assess perceived capacity of medical school ethics committees through ethics committee members and delineate areas for improvement; West India                                                                              | Research Ethics Committee Quality Assurance Self-Assessment Tool filled by member secretaries of two ethics committees, n=2; Interviews with committee members, n=6 |
| Davis et al, 2017 <sup>76</sup>       | To explore perceptions of the 2013 regulatory changes for clinical research among ethics committee members; South and West India                                                                                               | Questionnaire survey; n=25 members from 25 ethics committees                                                                                                        |
| Ganguly et al, 2016 <sup>79</sup>     | To describe the newly introduced audio-visual recording of the IC process for clinical trials and the perceptions of investigators and trial participants of the same; Gujarat, India                                          | Observations of audio-visual recordings of IC process, n=5; Interviews, n=8 (3 investigators and 5 trial participants)                                              |
| Gupta et al, 2018 <sup>83</sup>       | To examine the audio-visual consent process during a Phase 3 rotavirus vaccine trial in healthy infants and parent/guardian participation in the consent process; Chandigarh, India                                            | Audio-visual recordings of consent process; n=100                                                                                                                   |
| Hate et al, 2015 <sup>84</sup>        | To examine key stakeholders' perspectives on data sharing in the context of research involving women and children; Mumbai, Maharashtra, India                                                                                  | Interviews, n=22; Focus groups, n=44 in four focus groups (researchers, managers, research participants, ethics committee members)                                  |
| Jadhav et al, 2013 <sup>133</sup>     | To understand perceptions regarding the ethics of clinical research among clinical research professionals; India                                                                                                               | Questionnaire survey; n=34 (27 sponsor/contract research organisation staff; 6 ethics committee members; 1 investigator)                                            |
| Kadam et al, 2016 <sup>89</sup>       | To assess perceptions of the 2013 regulatory changes for clinical research among clinical trial investigators; India                                                                                                           | Questionnaire survey; n=73                                                                                                                                          |
| Kamat, 2014 <sup>90</sup>             | To elicit perspectives of stakeholders regarding media representation of their work and ethical issues arising from their engagement in clinical trials; Bangalore, Karnataka and Hyderabad, Telangana in India                | Interviews; n=42 (3 sponsors, 7 contract research organisation executives, 19 investigators, 13 ethics committee members)                                           |
| Kandhari et al, 2013 <sup>92</sup>    | To provide insights into the structure and functioning of ethics committees from the perspective of ethics committee members; New Delhi, India                                                                                 | Interviews; n=17                                                                                                                                                    |
| Nadimpally et al, 2017 <sup>103</sup> | To explore perceptions of clinical trials among trial participants and key informants; Gujarat, Maharashtra, New Delhi, Andhra Pradesh in India                                                                                | Interviews; n=36                                                                                                                                                    |
| Newman et al, 2015 <sup>105</sup>     | To elicit perspectives and experiences of key informants involved in community stakeholder engagement activities, in the context of previous HIV vaccine trials in four countries, including India; Chennai, Tamil Nadu, India | Interviews, n=93 interviews; Focus groups, n=140 in 21 focus groups                                                                                                 |
| Parikh et al, 2011 <sup>136</sup>     | To assess the perceptions regarding the clinical drug trial industry among various stakeholders; India                                                                                                                         | Questionnaire survey; n=181 (clinical research coordinators/assistants, investigators, managers, directors)                                                         |

|                                      |                                                                                                                                                                                                                                                                          |                                                                                                                    |
|--------------------------------------|--------------------------------------------------------------------------------------------------------------------------------------------------------------------------------------------------------------------------------------------------------------------------|--------------------------------------------------------------------------------------------------------------------|
| Patel et al, 2016 <sup>108</sup>     | To explore perceptions regarding the ethical review process and performance of ethics committees among clinical research professionals; India                                                                                                                            | Questionnaire survey; n=385                                                                                        |
| Patel et al, 2016 <sup>109</sup>     | To understand perceptions regarding ethical standards and issues in clinical trials in Indian among clinical research professionals; India                                                                                                                               | Questionnaire survey; n=385                                                                                        |
| Rajaraman et al, 2011 <sup>111</sup> | To assess extent of participation during informed consent process among parents providing consent for children's participation in an observational tuberculosis study; Palamaner, Chittoor, Andhra Pradesh, India                                                        | Observation notes on questions asked by parents during informed consent process; n=4382                            |
| Sariola et al, 2015 <sup>115</sup>   | To explore perceptions of contract research organisations' staff regarding changes in the clinical trial industry since 1995 and 2005, outsourcing of clinical trials to India and models of collaborations; Bangalore, Karnataka; Mumbai, Maharashtra; New Delhi, India | Interviews; n=25 (clinical research assistants, managers, protocol writers, quality assurers, statisticians, CEOs) |
| Sariola et al, 2019 <sup>114</sup>   | To explore the role of civil society organisations, academic and public health researchers and health activists in changing the regulations for clinical trials in India; India                                                                                          | Interviews; n=25 (academic public health and medical researchers, health activists)                                |
| Simpson et al, 2015 <sup>121</sup>   | To identify the tensions that emerge for ethics committee members as the capacity to conduct credible ethical review of clinical trials is developed across three countries including India                                                                              | Interviews; n=14 ethics committee members from India                                                               |
| Vaz et al, 2015 <sup>127</sup>       | To explore the perceptions, motivations and concerns of the public with respect to participation in clinical trials and biobanking-related research; Bangalore, Karnataka, India                                                                                         | Interviews; n=14                                                                                                   |
| Vaz et al, 2018 <sup>128</sup>       | To understand views on the ethics of biobanking research among ethics committee members and medical researchers; Bangalore, Karnataka, India                                                                                                                             | Interviews; n=43 (21 ethics committee members and 22 researchers)                                                  |
| Vaidya et al, 2016 <sup>126</sup>    | To investigate if coercion is involved in decision-making of medical undergraduate and postgraduate students participating in research; Mumbai, Maharashtra, India                                                                                                       | Questionnaire survey; n=300                                                                                        |

### B. Secondary Research: Reviews of documents

|                                       |                                                                                                                                                                                                                                                           |                                                                                                                                             |
|---------------------------------------|-----------------------------------------------------------------------------------------------------------------------------------------------------------------------------------------------------------------------------------------------------------|---------------------------------------------------------------------------------------------------------------------------------------------|
| Bavdekar, 2009 <sup>64</sup>          | To determine the extent to which issues related to the provision of free treatment and compensation for research-related injury are addressed in the informed consent documents from protocols submitted to ethics committees; Mumbai, Maharashtra, India | Documentary analysis; n=138                                                                                                                 |
| Bhide et al, 2016 <sup>66</sup>       | To evaluate the impact of the 2013 regulatory changes on ethics committee structure, review process, outcomes and administration; Mumbai, Maharashtra, India                                                                                              | Documentary analysis                                                                                                                        |
| Chaturvedi et al, 2017 <sup>139</sup> | To assess if clinical trials were in line with the health care needs of the country by auditing the clinical trials registry of India                                                                                                                     | Database analysis (Clinical Trials Registry of India)                                                                                       |
| Jadhav et al, 2015 <sup>85</sup>      | To evaluate completeness of ethics application forms submitted for review to ethics committees; Maharashtra, India                                                                                                                                        | Documentary analysis; n=100                                                                                                                 |
| Jhanwar et al, 2010 <sup>86</sup>     | To assess the ease of readability of translated informed consent forms used in psychiatric clinical trials; Varanasi, Uttar Pradesh, India                                                                                                                | Documentary analysis; n=30                                                                                                                  |
| Kundapura et al, 2013 <sup>95</sup>   | To assess compliance of informed consent documents with regulations; Pune, Maharashtra, India                                                                                                                                                             | Documentary analysis; n=50                                                                                                                  |
| Kuyare et al, 2014 <sup>96</sup>      | To assess queries raised by ethics committees in uninitiated studies and whether these studies obtained ethics approval elsewhere; Mumbai, Maharashtra, India                                                                                             | Documentary and database analysis; n=219 uninitiated studies (minutes of ethics committee meetings) and Clinical Trials Registry-India data |
| Padhy et al, 2011 <sup>107</sup>      | To assess compliance of informed consent documents from protocols submitted to ethics committees in relation to the Indian Good Clinical Practice guidelines; New Delhi, India                                                                            | Documentary analysis; n=300                                                                                                                 |

|                                                |                                                                                                                                                                                                                 |                                                                                                                                                                                                                   |
|------------------------------------------------|-----------------------------------------------------------------------------------------------------------------------------------------------------------------------------------------------------------------|-------------------------------------------------------------------------------------------------------------------------------------------------------------------------------------------------------------------|
| Patwardhan et al, 2014 <sup>110</sup>          | To compare the quality and completeness of data and documentation between an investigator-initiated trial and an industry-sponsored study; Mumbai, Maharashtra, India                                           | Documentary analysis and data from 42 patients (28 from investigator-initiated trial; 14 from industry-sponsored study)                                                                                           |
| Selvarajan et al, 2013 <sup>141</sup>          | To evaluate the trends in clinical trials in India compared to other countries, and make comparisons to India's disease burden                                                                                  | Database analysis (multiple clinical trial registries)                                                                                                                                                            |
| Shah et al, 2016 <sup>118</sup>                | To check completeness and find errors in application forms submitted to ethics committees; Bhavnagar, Gujarat, India                                                                                            | Documentary analysis; n=100                                                                                                                                                                                       |
| Shetty et al, 2012 <sup>120</sup>              | To review ethics committee application forms for completeness; Mumbai, Maharashtra, India                                                                                                                       | Documentary analysis; n=445                                                                                                                                                                                       |
| Shetty et al, 2012 <sup>119</sup>              | To monitor adherence to protocol and the informed consent process through clinical research site visits by ethics committee members; Mumbai, Maharashtra                                                        | Documentary analysis; n=7 site monitoring reports                                                                                                                                                                 |
| Marathe et al, 2018 <sup>99</sup>              | To study the payments for participation allowed by ethics committees and reasons for payments; Mumbai, Maharashtra, India                                                                                       | Documentary analysis; n=227 studies (ethics application forms, protocols, informed consent documents, correspondence of ethics committees with investigators)                                                     |
| Nishandar et al, 2019 <sup>106</sup>           | To evaluate status of registered, re-registered and accredited ethics committees in India in relation to regulations; India                                                                                     | Database analysis (Central Drugs Standard Control Organization, National Accreditation Board for Hospitals and Healthcare Providers, Clinical Trials Registry of India and Census data); n=1268 ethics committees |
| Taur et al, 2011 <sup>123</sup>                | To determine extent to which ethics committees comply with requirements mentioned in guidelines and regulations while issuing letters of approval; Mumbai, Maharashtra, India                                   | Documentary analysis; n=20 (approval letters from 20 ethics committees)                                                                                                                                           |
| <b>B. Secondary Research: Journal articles</b> |                                                                                                                                                                                                                 |                                                                                                                                                                                                                   |
| Bavdekar et al, 2008 <sup>63</sup>             | To determine proportion of research manuscripts reporting on ethical clearance and obtaining informed consent and/or assent in two paediatric journals published from India                                     | Documentary analysis; n=132 manuscripts                                                                                                                                                                           |
| Chaturvedi et al, 2009 <sup>71</sup>           | To examine whether informed consent and ethical approval were reported in published psychiatric research in one psychiatric journal published from India                                                        | Documentary analysis; n=157 manuscripts                                                                                                                                                                           |
| Chin et al, 2011 <sup>74</sup>                 | To explore how often journal articles reporting HIV research sponsored by a developed country but conducted in a developing country mention ethics approval from both countries; four countries including India | Documentary analysis; n=50 manuscripts from India                                                                                                                                                                 |
| Klitzman et al, 2010 <sup>93</sup>             | To explore how often human subject research on HIV reported a funding source and conflict of interest in four countries, including India                                                                        | Documentary analysis; n=79 manuscripts from India                                                                                                                                                                 |
| Klitzman et al, 2011 <sup>94</sup>             | To investigate how often human subject research on HIV reported on ethical approval in four countries, including India                                                                                          | Documentary analysis; n=79 manuscripts from India                                                                                                                                                                 |
| Tharyan et al, 2013 <sup>124</sup>             | To evaluate improvements in Indian journals' editorial policies and reporting quality of RCTs and to compare with reporting quality of protocols in the Clinical Trials Registry-India                          | Documentary analysis; n=67 Indian medical journals; 145 published trial reports; 768 randomised trials registered on the Clinical Trials Registry-India                                                           |
